# Supplementary material
Source: MDPI journal article supplement (https://www.mdpi.com/2673-933X/1/1/3)
Supplement: s1 [file s1]

Table S1: 16S V4 sequence depth data

| Treatment group (individual animal identifier) | Sequence counts | Treatment group (individual animal identifier) | Sequence counts |
|------------------------------------------------|-----------------|------------------------------------------------|-----------------|
| ST (Sensitive/untreated)                       |                 | RUT (Resistant/treated)                        |                 |
| RF OV1                                         | 195478          | RF OV11                                        | 253884          |
| RF OV2                                         | 190157          | RF OV12                                        | 200802          |
| RF OV3                                         | 221776          | RF OV13                                        | 219199          |
| RF OV4                                         | 171003          | RF OV14                                        | 203791          |
| RF OV5                                         | 262980          | RF OV15                                        | 289827          |
| SUT (Sensitive/untreated)                      |                 | RT (Resistant/treated)                         |                 |
| RF OV6                                         | 180285          | RF OV16                                        | 118718          |
| RF OV7                                         | 256887          | RF OV17                                        | 124906          |
| RF OV8                                         | 218121          | RF OV18                                        | 177617          |
| RF OV9                                         | 228227          | RF OV19                                        | 258684          |
| RF OV10                                        | 258311          | RF OV20                                        | 154489          |
| ST (Sensitive/untreated)                       |                 | RUT (Resistant/treated)                        |                 |
| TIMS OV1                                       | 6287            | TIMS OV11                                      | 13467           |
| TIMS OV2                                       | 7314            | TIMS OV12                                      | 8150            |
| TIMS OV3                                       | 40442           | TIMS OV13                                      | 31301           |
| TIMS OV4                                       | 8343            | TIMS OV14                                      | 28376           |
| TIMS OV5                                       | 28166           | TIMS OV15                                      | 4812            |
| SUT (Sensitive/untreated)                      |                 | RT (Resistant/treated)                         |                 |
| TIMS OV6                                       | 7017            | TIMS OV16                                      | 47474           |
| TIMS OV7                                       | 29756           | TIMS OV17                                      | 15889           |
| TIMS OV8                                       | 22214           | TIMS OV18                                      | 7954            |
| TIMS OV9                                       | 8853            | TIMS OV19                                      | 9599            |
| TIMS OV10                                      | 1900            | TIMS OV20                                      | 16708           |

ST, sensitive isolate+monepantel administration; SUT, sensitive isolate untreated; RT, resistant isolate+monepantel administration; RUT, resistant isolate untreated; OV, ovine; RF, rectal faeces; TIMS, Terminal ileum mucosal scrapings
