# Supplementary material
Source: MDPI journal article supplement (https://www.mdpi.com/2673-933X/1/1/3)

A

Rectal Faecal Sample Order-Level Abundances

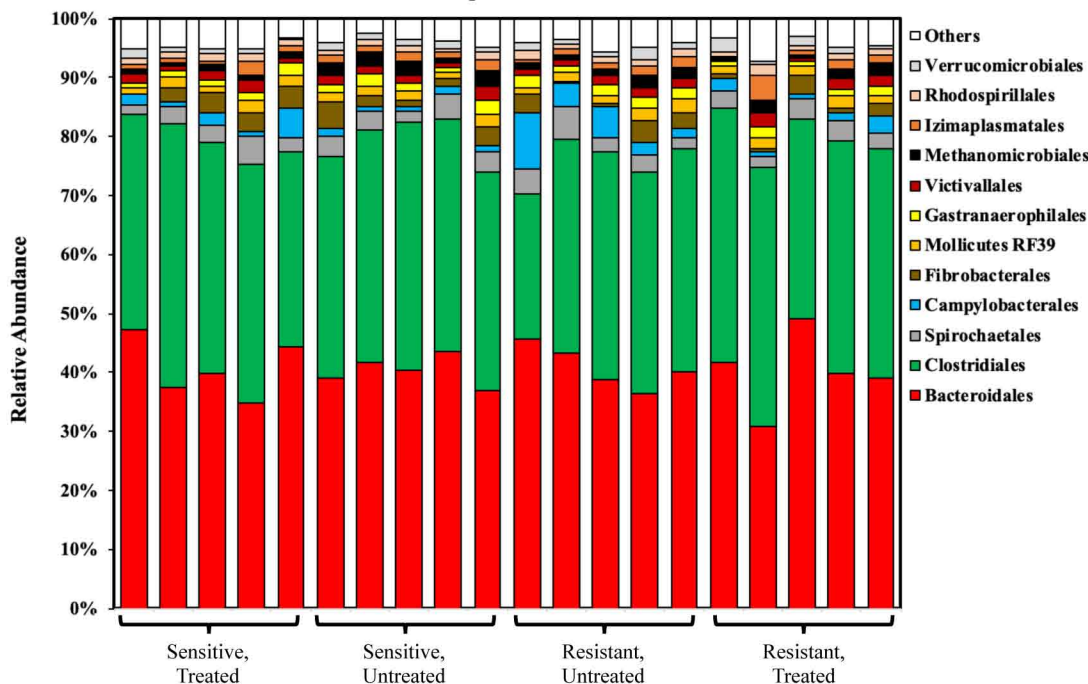

B

TIMS Sample Order-Level Abundances

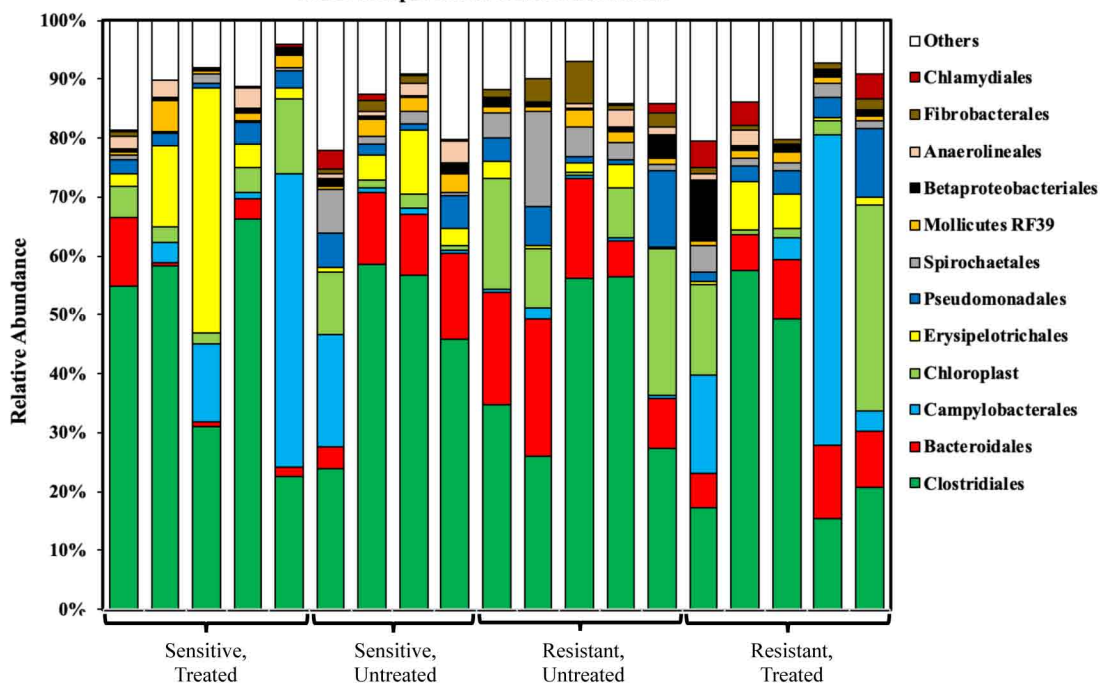

Supplement: s1 [file s1]
